# Supplementary material for: Wide gamut white light emitting diodes using quantum dot-silicone film protected by an atomic layer deposited TiO2 barrier
Source: Royal Society of Chemistry journal article supplement (doi:10.1039/c5cc05299h), 2015-01-01
Supplement: c5cc05299h2.pdf [file c5cc05299h2.pdf]

## Supporting Information

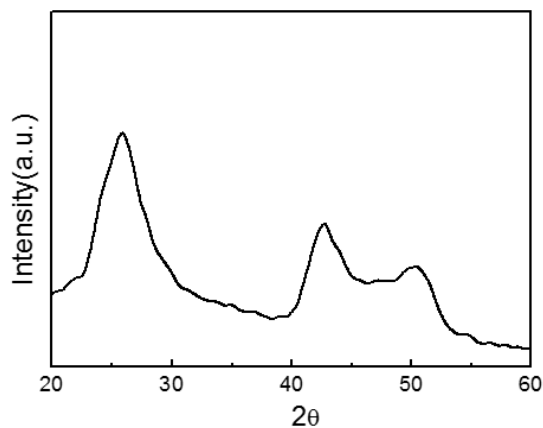

Fig. S1 XRD of CdSe/ZnS quantum dots in multimodal size distribution.

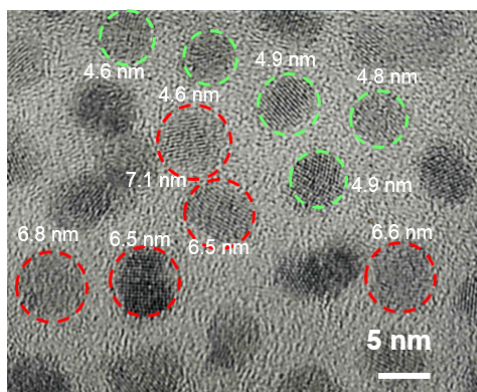

Fig. S2 TEM image of CdSe/ZnS quantum dots in multimodal size distribution.

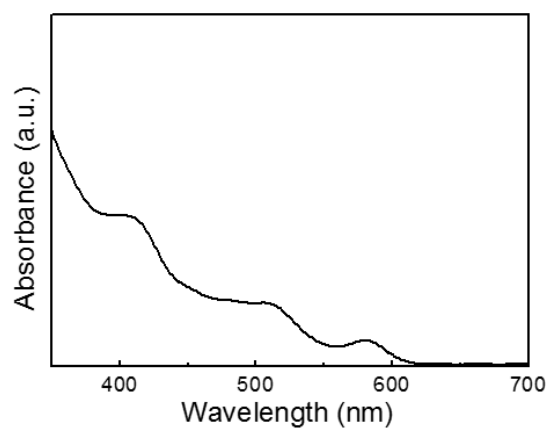

Fig. S3 Optical absorption spectrum of CdSe/ZnS quantum dots in multimodal size distribution.
