# Supplementary figures and images for: Wide gamut white light emitting diodes using quantum dot-silicone film protected by an atomic layer deposited TiO2 barrier
Source: Royal Society of Chemistry journal article supplement (doi:10.1039/c5cc05299h), 2015-01-01

Fig. 1

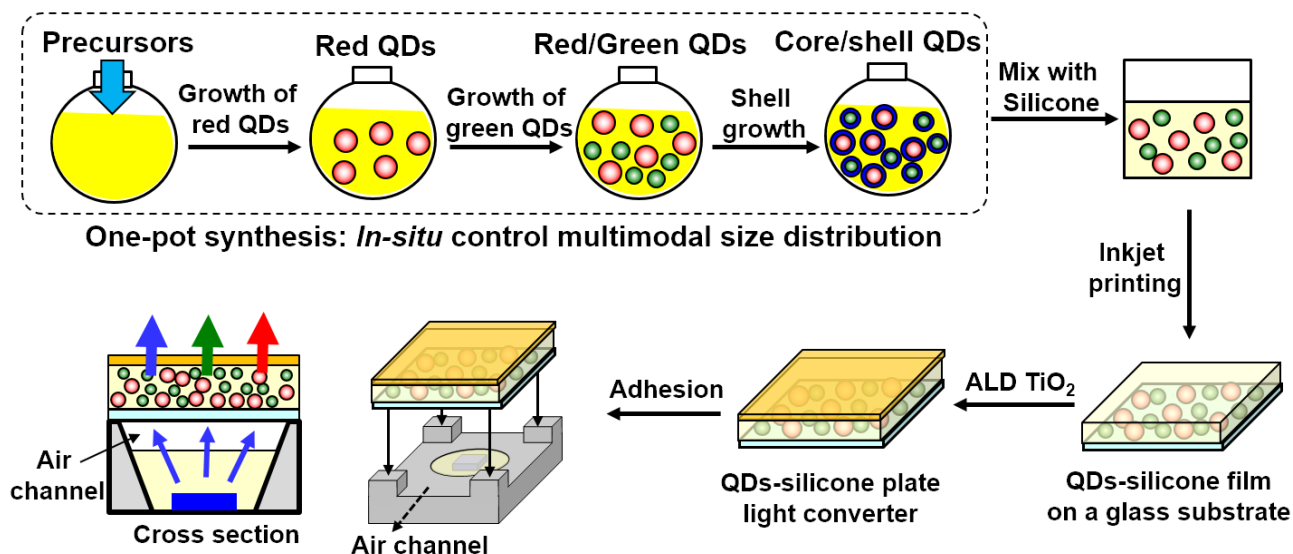

Fig. 2

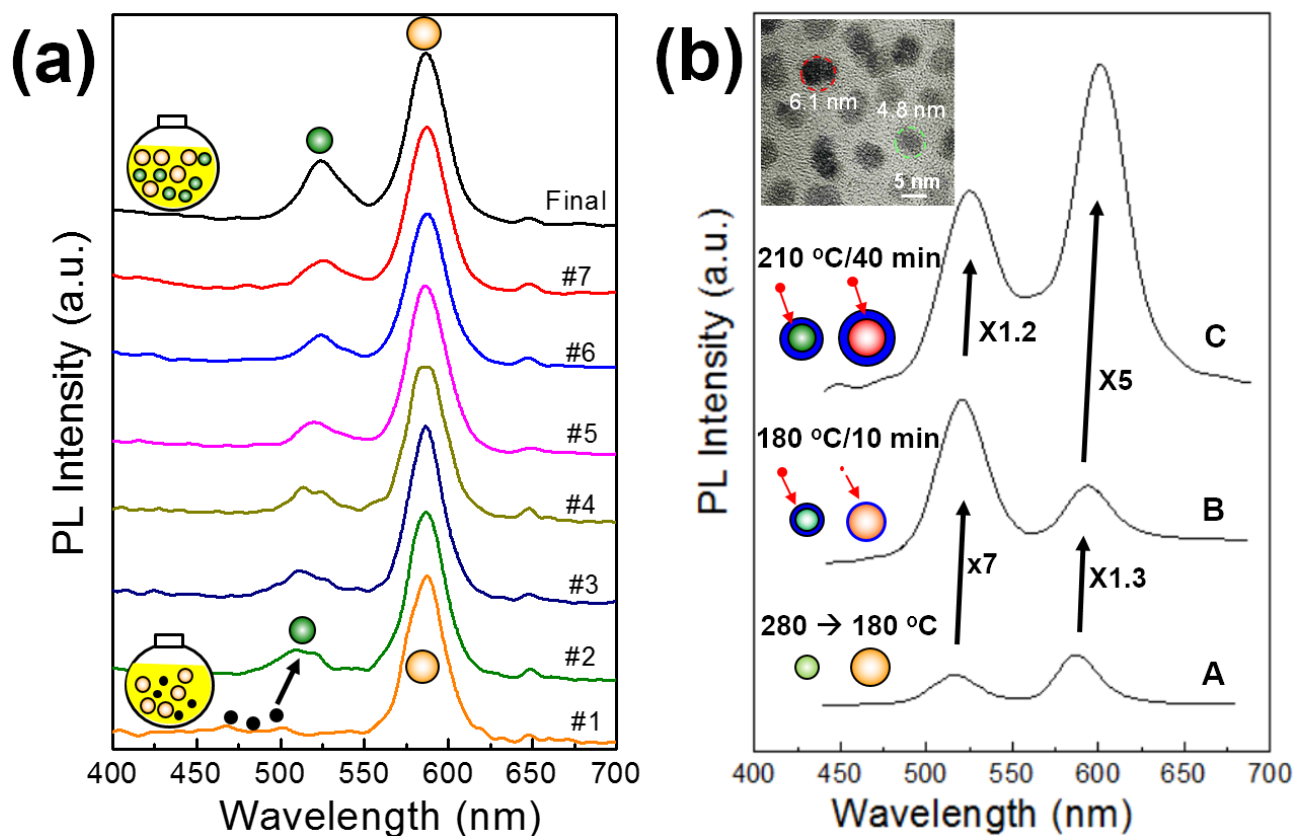

Fig. 3

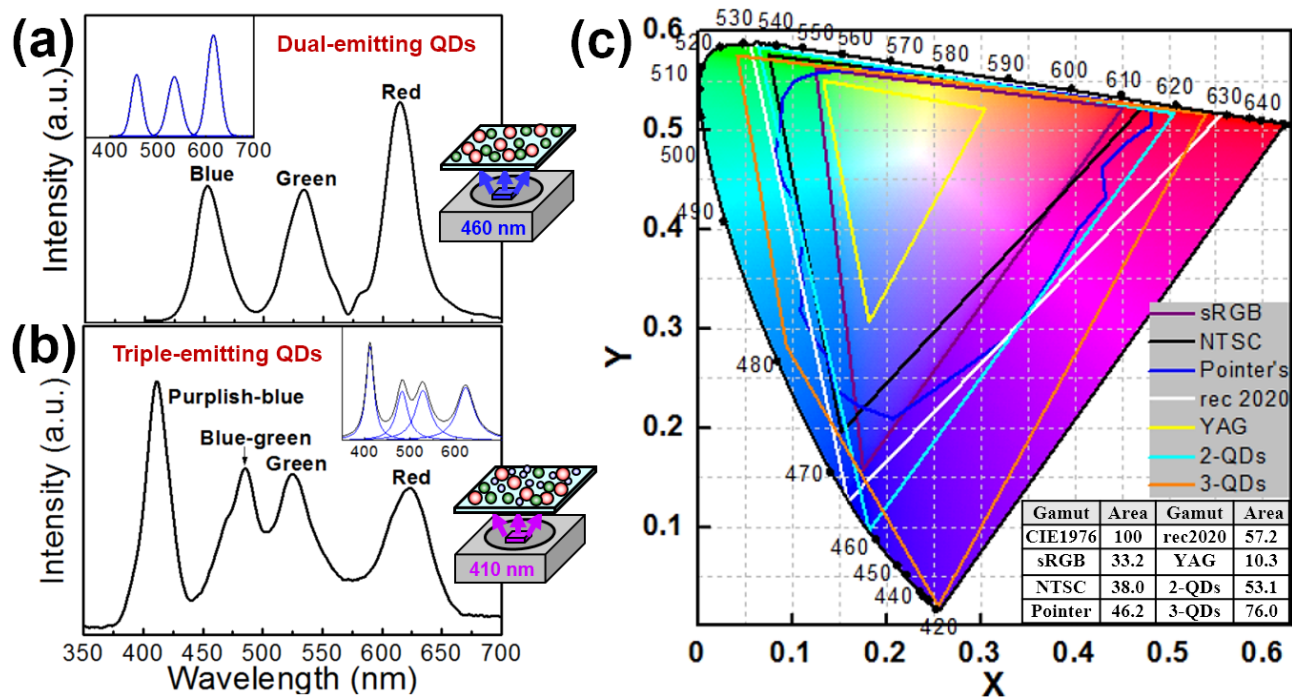

Fig. 3

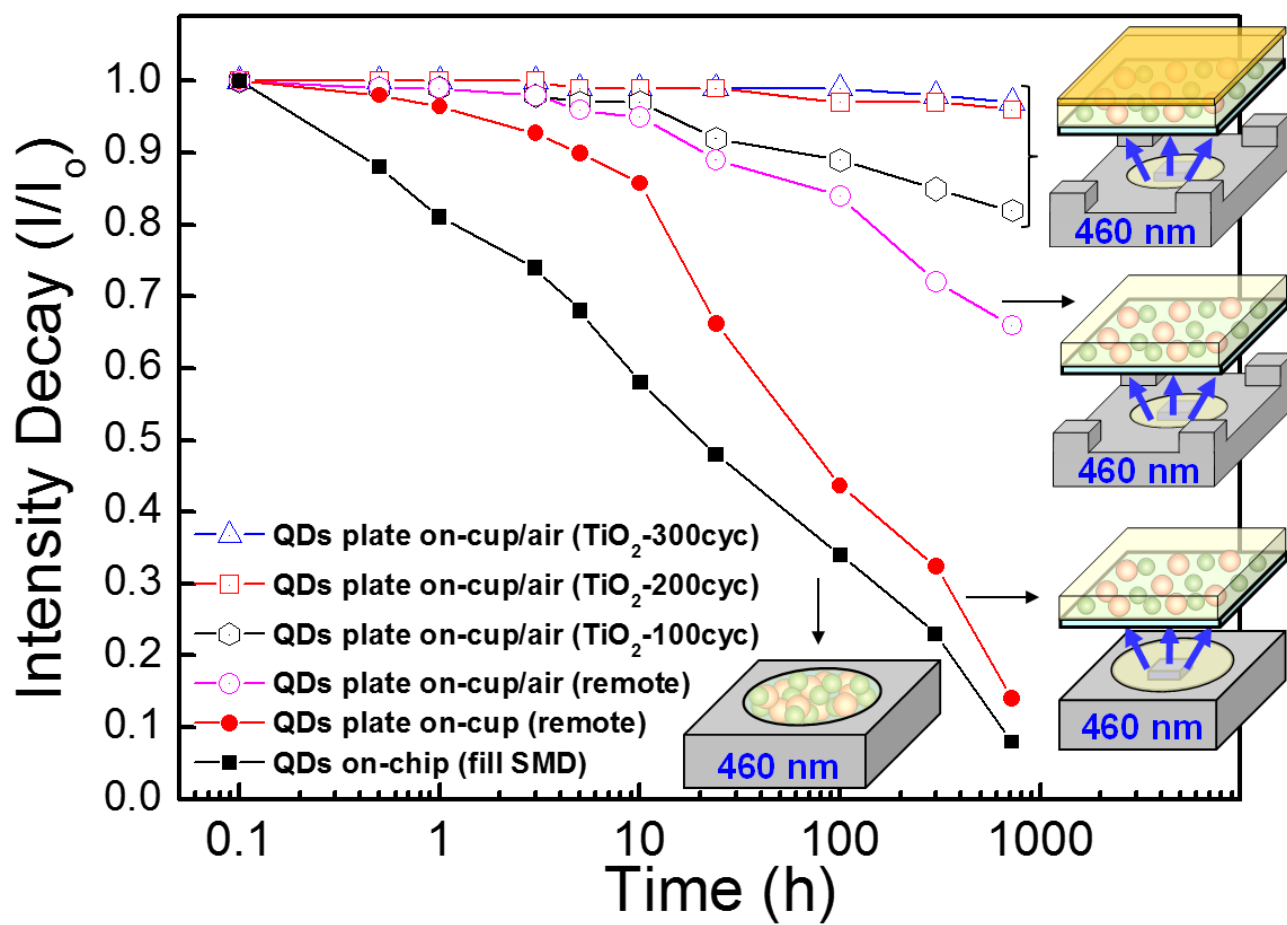

Supplement: c5cc05299h1.pdf [file c5cc05299h1.pdf]
